# Supplementary material for: Pressure-induced structural phase transition, irreversible amorphization and upconversion luminescence enhancement in Ln3+-codoped LiYF4 and LiLuF4
Source: Royal Society of Chemistry journal article supplement (doi:10.1039/d3tc00939d), 2023-01-01
Supplement: d3tc00939d1.pdf [file d3tc00939d1.pdf]

Supporting Information for:

**Pressure-induced structural phase transition, irreversible amorphization and upconversion luminescence enhancement in  $Ln^{3+}$  codoped  $LiYF_4$  and  $LiLuF_4$**

Yingying Ma,<sup>a</sup> Ting Wen,<sup>\*a</sup> Ke Liu,<sup>a</sup> Dequan Jiang,<sup>b</sup> Mei-Huan Zhao,<sup>c</sup> Chuanlong Lin,<sup>a</sup> and Yonggang Wang<sup>\* a,b</sup>

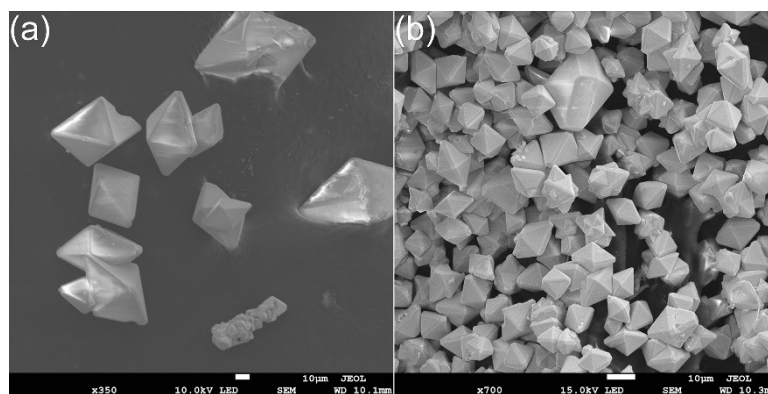

**Fig. S1** SEM images of (a)  $LiYF_4$  and (b)  $LiLuF_4$ .

**Table 1.** The calculated lattice parameters for undoped and  $Ln^{3+}$  doped  $LiYF_4$  and  $LiLuF_4$  samples.

| Samples                              | Space group | $a(\text{\AA})$ | $c(\text{\AA})$ | $V(\text{\AA}^3)$ |
|--------------------------------------|-------------|-----------------|-----------------|-------------------|
| $LiYF_4$                             | $I4_1/a$    | 5.1695(1)       | 10.7309(1)      | 286.77(1)         |
| $LiYF_4:19\%Yb^{3+}/1\%Er^{3+}$      |             | 5.1679(1)       | 10.7225(3)      | 286.37(2)         |
| $LiYF_4:19\%Yb^{3+}/1\%Ho^{3+}$      |             | 5.1675(1)       | 10.7194(3)      | 286.24(1)         |
| $LiYF_4:19.9\%Yb^{3+}/0.1\%Tm^{3+}$  |             | 5.1672(1)       | 10.7196(3)      | 286.21(1)         |
| $LiLuF_4$                            |             | 5.1261(1)       | 10.5440(2)      | 277.06(1)         |
| $LiLuF_4:19\%Yb^{3+}/1\%Er^{3+}$     |             | 5.1296(1)       | 10.5583(1)      | 277.82(1)         |
| $LiLuF_4:19\%Yb^{3+}/1\%Ho^{3+}$     |             | 5.1293(1)       | 10.5576(1)      | 277.77(1)         |
| $LiLuF_4:19.9\%Yb^{3+}/0.1\%Tm^{3+}$ |             | 5.1290(1)       | 10.5557(1)      | 277.69(1)         |

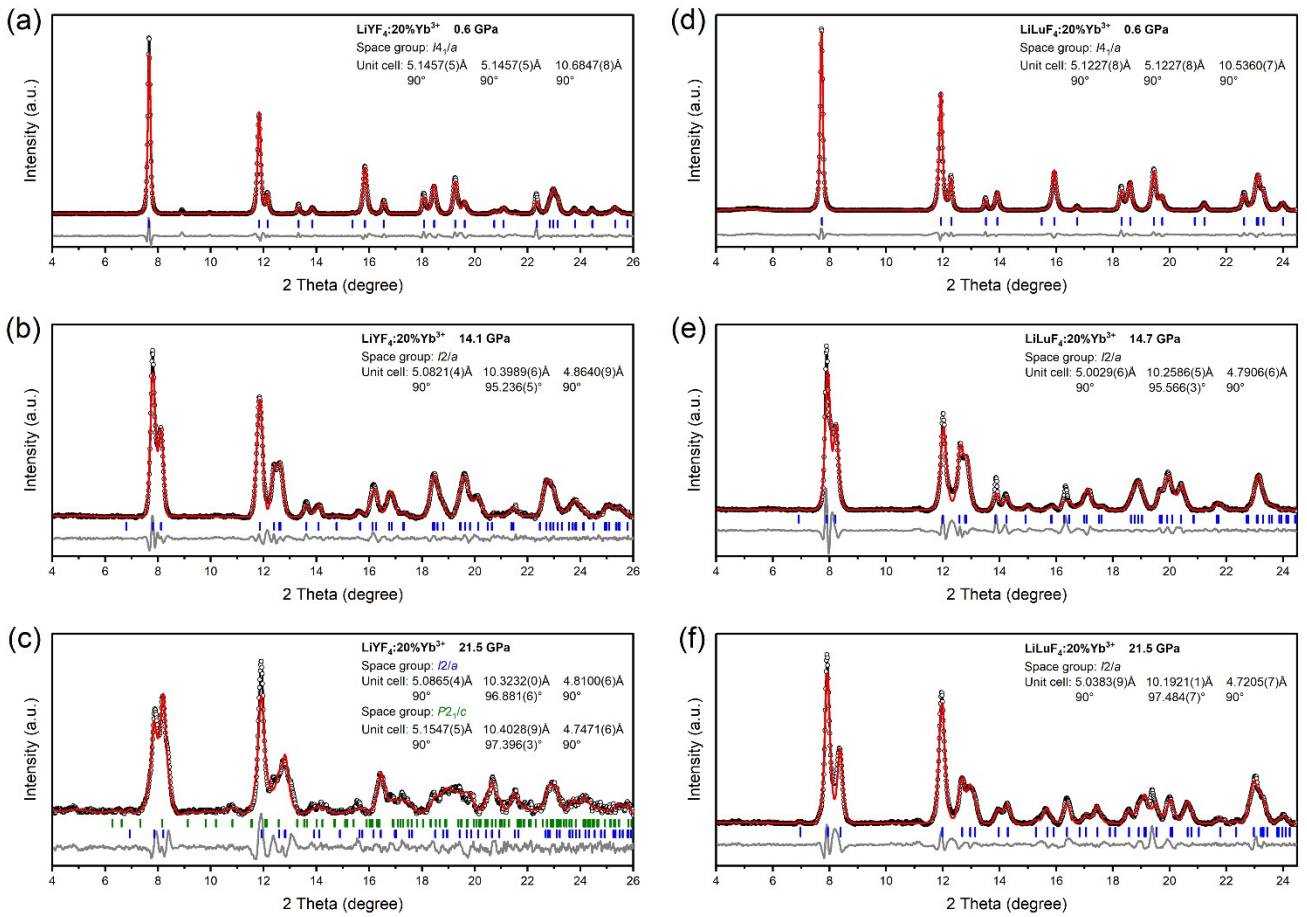

Fig. S2 Le Bail refinement based on the powder XRD data of (a)  $\text{LiYF}_4:20\%\text{Yb}^{3+}$  at 0.6 GPa; (b)  $\text{LiYF}_4:20\%\text{Yb}^{3+}$  at 14.1 GPa; (c)  $\text{LiYF}_4:20\%\text{Yb}^{3+}$  at 21.5 GPa; (d)  $\text{LiLuF}_4:20\%\text{Yb}^{3+}$  at 0.6 GPa; (e)  $\text{LiLuF}_4:20\%\text{Yb}^{3+}$  at 14.7 GPa; (f)  $\text{LiLuF}_4:20\%\text{Yb}^{3+}$  at 21.5 GPa.

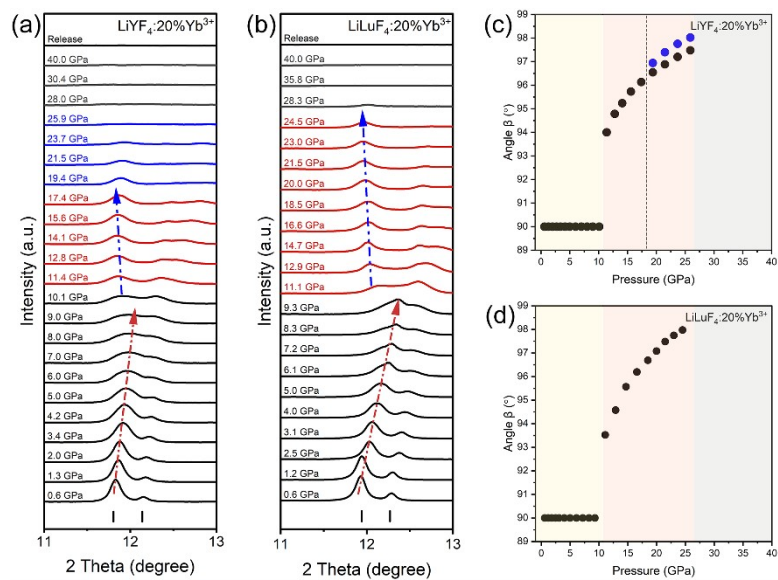

Fig. S3 Enlarged XRD patterns in the  $2\theta$  range of  $11^\circ$  to  $13^\circ$  in (a)  $\text{LiYF}_4:20\%\text{Yb}^{3+}$  and (b)  $\text{LiLuF}_4:20\%\text{Yb}^{3+}$ , respectively. Pressure dependence of angle  $\beta$  of (c)  $\text{LiYF}_4:20\%\text{Yb}^{3+}$  and (d)  $\text{LiLuF}_4:20\%\text{Yb}^{3+}$ , respectively.

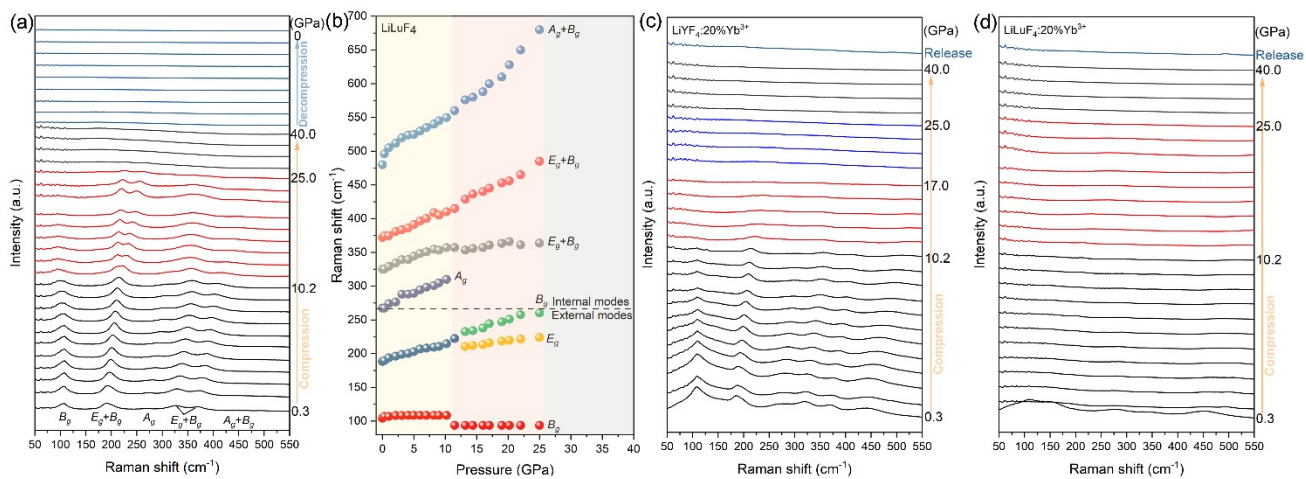

**Fig. S4** Raman spectra of (a)  $\text{LiLuF}_4$ , (c)  $\text{LiF}_4:20\%\text{Yb}^{3+}$  and (d)  $\text{LiLuF}_4:20\%\text{Yb}^{3+}$  under compression and decompression. (b) Pressure dependence of the Raman peak positions in the wavenumber range of 50~600  $\text{cm}^{-1}$  in  $\text{LiLuF}_4$ .

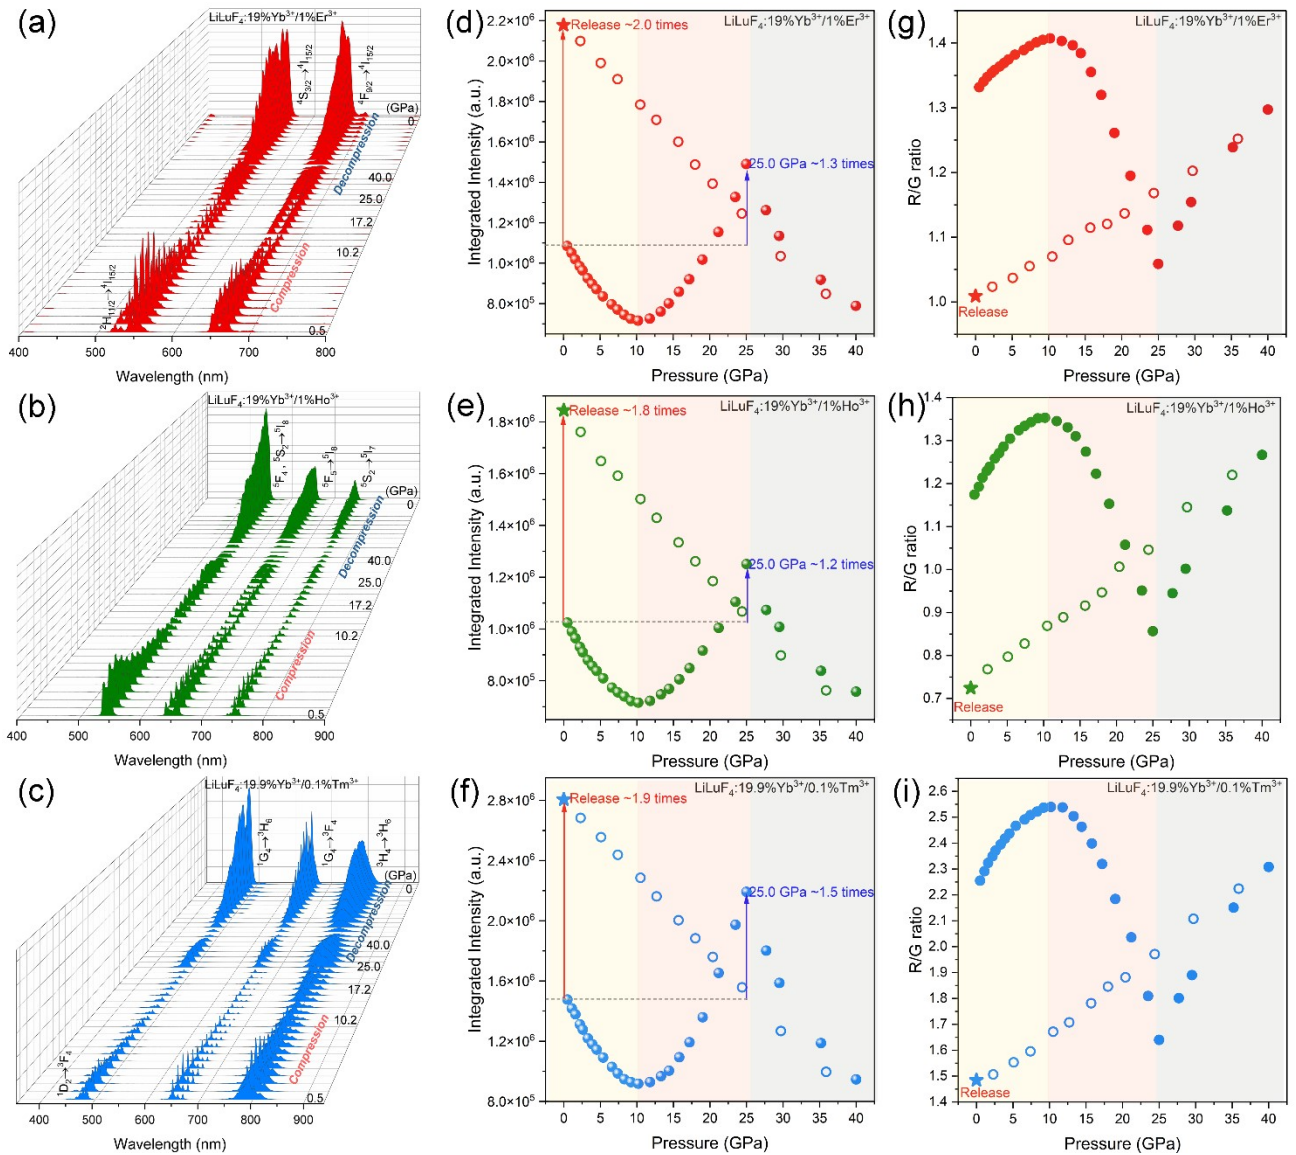

**Fig. S5** UC PL spectra of (a)  ${}^2H_{11/2} \rightarrow {}^4I_{15/2}$ ,  ${}^4S_{3/2} \rightarrow {}^4I_{15/2}$  and  ${}^4F_{9/2} \rightarrow {}^4I_{15/2}$  in  $\text{LiLuF}_4:19\%Yb^{3+}/1\%Er^{3+}$  (b)  ${}^5F_4, {}^5S_2 \rightarrow {}^5I_8$ ,  ${}^5F_5 \rightarrow {}^5I_8$  and  ${}^5S_2 \rightarrow {}^5I_7$  in  $\text{LiLuF}_4:19\%Yb^{3+}/1\%Ho^{3+}$  (c)  ${}^1D_2 \rightarrow {}^3F_4$ ,  ${}^1G_4 \rightarrow {}^3H_6$ ,  ${}^1G_4 \rightarrow {}^3F_4$ , and  ${}^3H_4 \rightarrow {}^3H_6$  in  $\text{LiLuF}_4:19.9\%Yb^{3+}/0.1\%Tm^{3+}$  under compression and release cycle. (d), (e), (f) Pressure-dependent UC luminescence total intensity evolution. The relative intensity ratios (R/G) of (g) red ( ${}^4F_{9/2} \rightarrow {}^4I_{15/2}$ ) and green ( ${}^2H_{11/2} \rightarrow {}^4I_{15/2}$ ,  ${}^4S_{3/2} \rightarrow {}^4I_{15/2}$ ), (h) red ( ${}^5F_5 \rightarrow {}^5I_8$ ,  ${}^5S_2 \rightarrow {}^5I_7$ ) and green ( ${}^5F_4, {}^5S_2 \rightarrow {}^5I_8$ ) and (i) red ( ${}^1G_4 \rightarrow {}^3F_4$ ,  ${}^3H_4 \rightarrow {}^3H_6$ ) and green ( ${}^1D_2 \rightarrow {}^3F_4$ ,  ${}^1G_4 \rightarrow {}^3H_6$ ) band transition of  $Ln^{3+}$  codoped  $\text{LiLuF}_4$  under pressure.

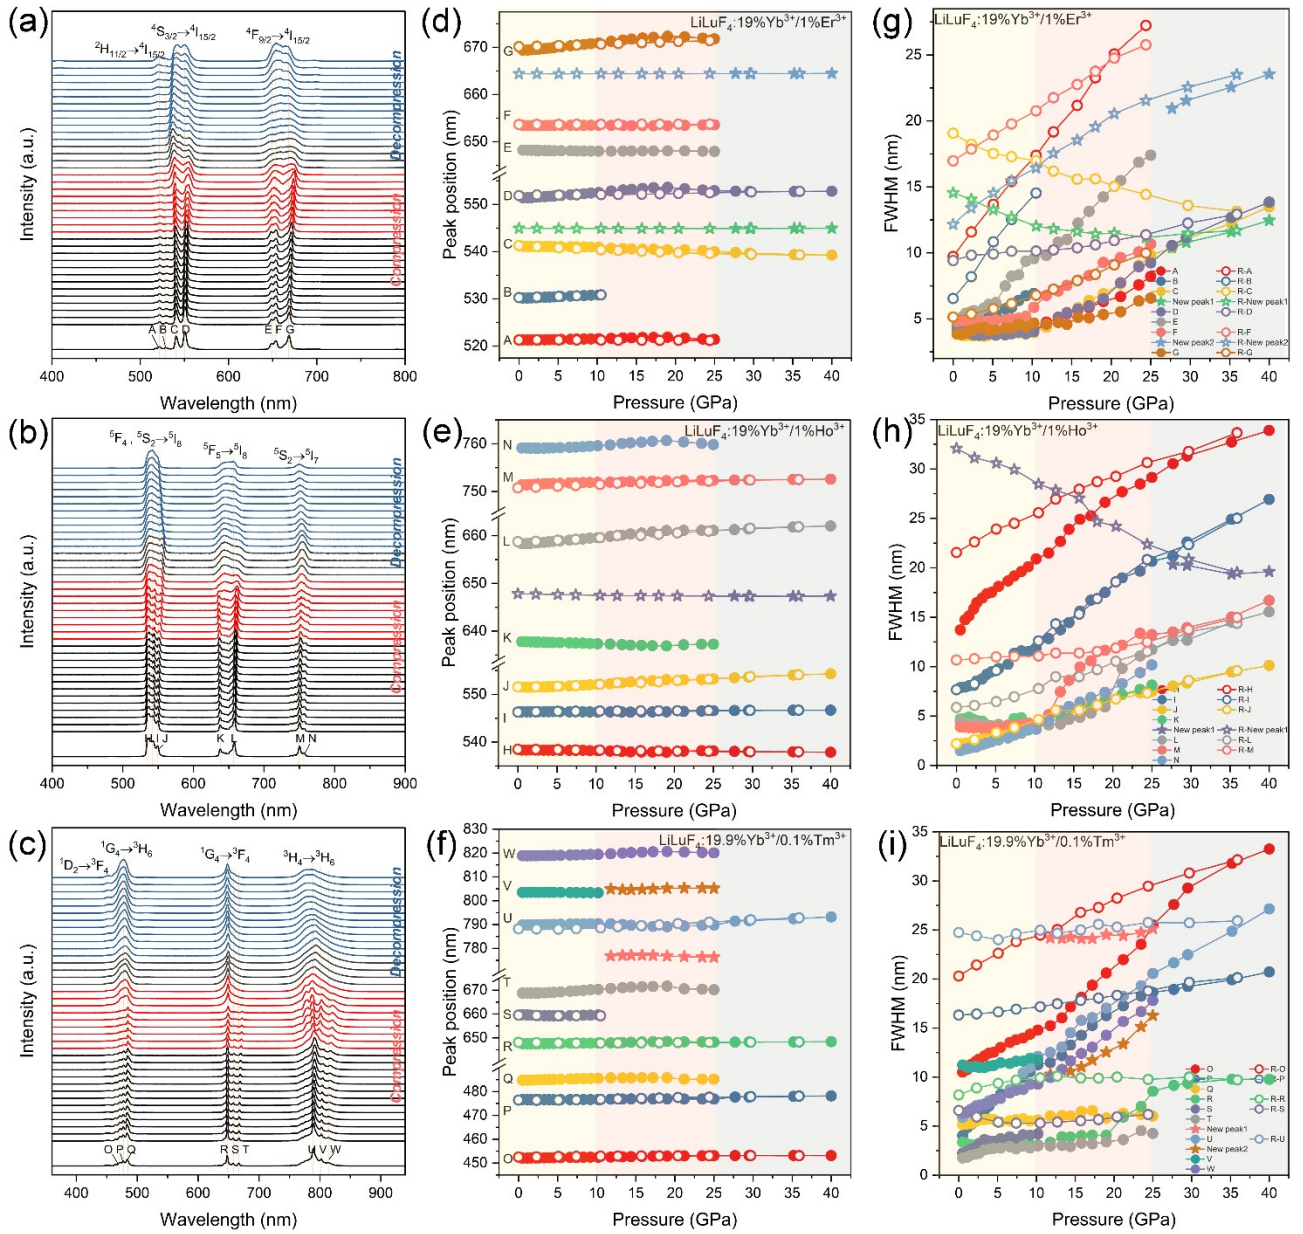

**Fig. S6** Resolved sublevels of (a)  $\text{LiLuF}_4:19\%\text{Yb}^{3+}/1\%\text{Er}^{3+}$  (b)  $\text{LiLuF}_4:19\%\text{Yb}^{3+}/1\%\text{Ho}^{3+}$  (c)  $\text{LiLuF}_4:19.9\%\text{Yb}^{3+}/0.1\%\text{Tm}^{3+}$  under compression and decompression. (d), (e), (f) Pressure dependence of peak position of individually resolved sublevels. (g), (h), (i) The FWHM of individually resolved sublevels as a function of pressure.

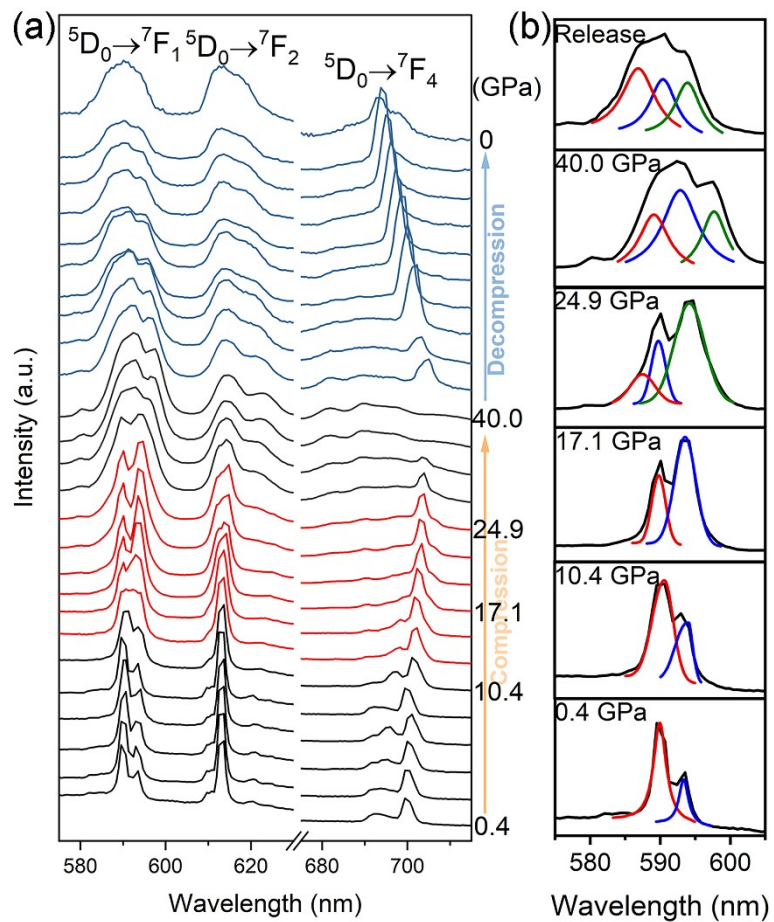

**Fig. S7** (a) Emission spectra of  $\text{LiLuF}_4:19\%\text{Yb}^{3+}/1\%\text{Eu}^{3+}$  under compression and decompression. (b) multipeak fitting of  ${}^5\text{D}_0 \rightarrow {}^7\text{F}_1$  at selected pressures.
